# Supplementary material for: Amyloid-beta antibody binding to cerebral amyloid angiopathy fibrils and risk for amyloid-related imaging abnormalities
Source: PubMed Central journal article supplement (PMC11091209; doi:10.1038/s41598-024-61691-2), 2024-05-13
Supplement: 41598_2024_61691_MOESM1_ESM.pdf [file 41598_2024_61691_MOESM1_ESM.pdf]

## **Supplementary information**

# **Amyloid-beta antibody binding to cerebral amyloid angiopathy fibrils and risk for amyloid-related imaging abnormalities**

Linda Söderberg<sup>1</sup>, Malin Johannesson<sup>1</sup>, Eleni Gkanatsiou<sup>1</sup>, Patrik Nygren<sup>1</sup>, Nicolas Fritz<sup>1</sup>,  
Olof Zachrisson<sup>1</sup>, Adeline Rachalski<sup>1</sup>, Anne-Sophie Svensson<sup>1</sup>, Emily Button<sup>1</sup>, Giacomo  
Dentoni<sup>1</sup>, Gunilla Osswald<sup>1</sup>, Lars Lannfelt<sup>1,2</sup>, Christer Möller<sup>1</sup>

<sup>1</sup>BioArctic AB, Warfvinges väg 35, 112 51, Stockholm, Sweden.

<sup>2</sup>Dept. of Public Health/Geriatrics, Uppsala University, 751 85, Uppsala, Sweden.

# Supplementary Fig. 1

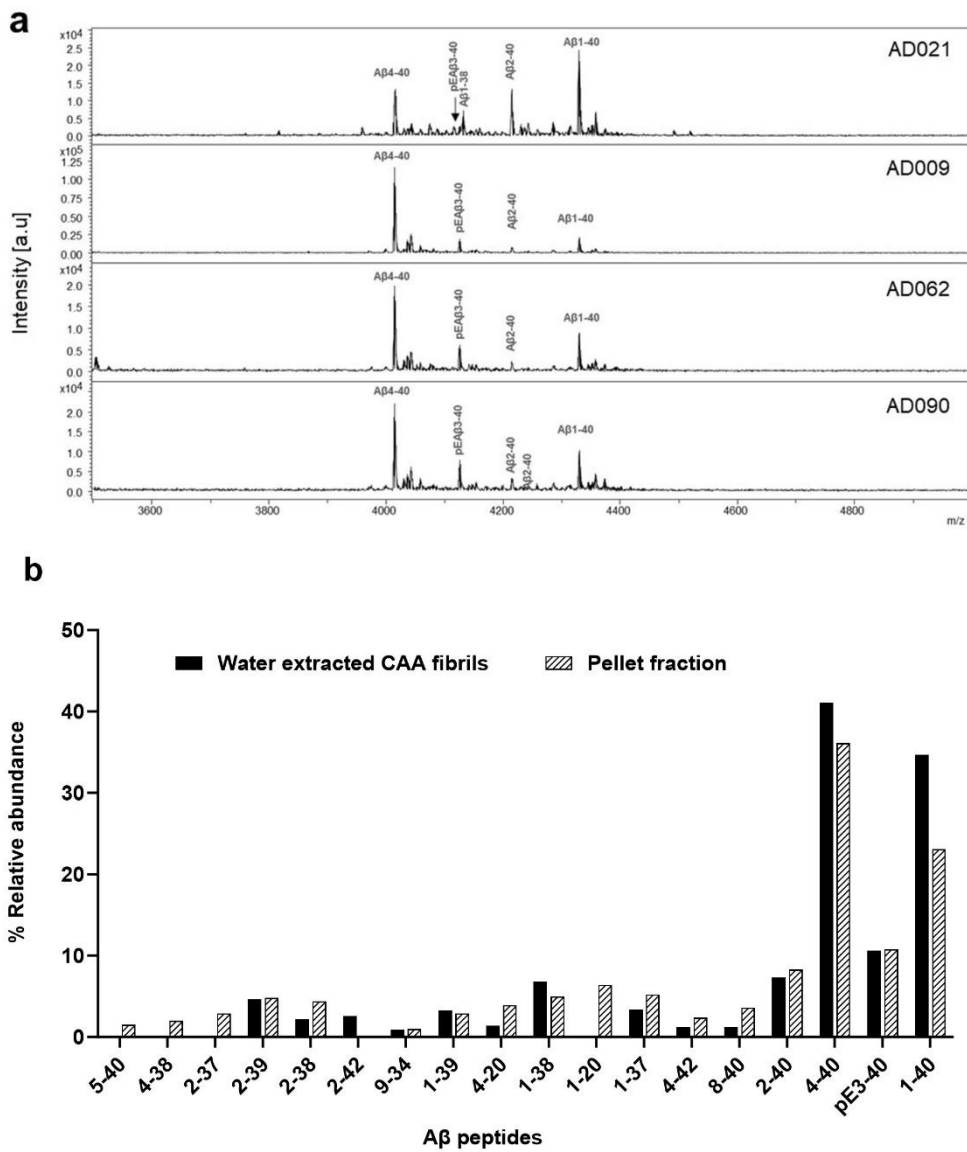

**Supplementary Figure 1.** IP-MALDI analyses of the FA-extracted pellet fractions from leptomeningeal tissues of AD subjects. **a**, Mass spectra for the indicated study subjects showing Aβ-assigned peaks. **b**, The relative abundance of the Aβ peptides identified in each pellet fraction sample (average of all subjects in **a**), as compared with the water-soluble extract from the same individual (data presented in Fig. 4).

## Supplementary Fig. 2

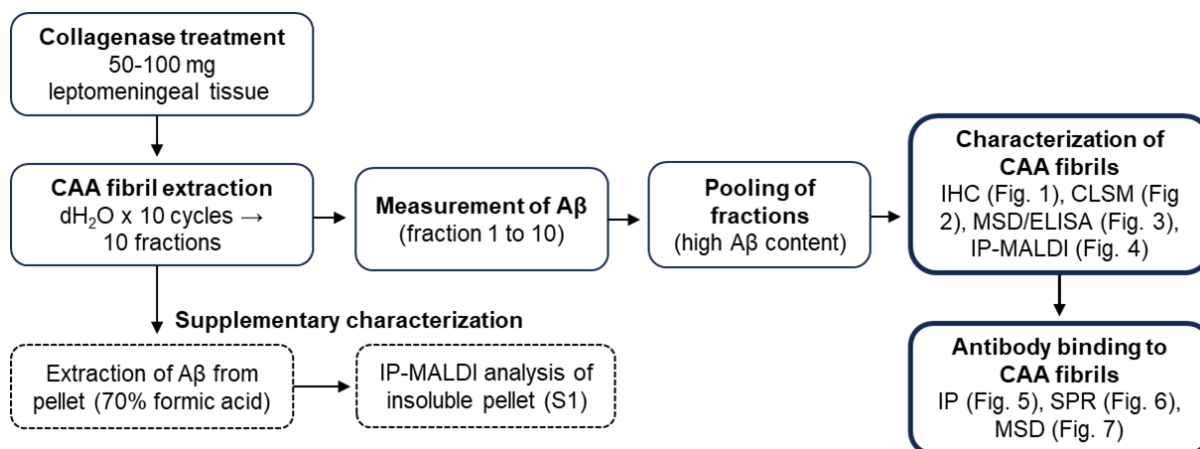

**Supplementary Figure 2.** Schematic outline of the steps used to isolate and characterize CAA A $\beta$  fibrils from human leptomeningeal tissue. Repeated water extraction of the tissue generated ten water fractions. The A $\beta$  content of each fraction was analyzed using the V-PLEX® A $\beta$  peptide panel 1 (4G8) assay (MSD). Fractions with high A $\beta$  levels (usually fractions 2 to 6) were pooled, generating a representative sample from each subject for use in subsequent analyses. In a supplementary characterization, the final pellet that remained after all the water extractions had been completed was extracted in 70% formic acid prior to peptide characterization using immunoprecipitation (IP) matrix-assisted laser desorption/ionization time-of-flight mass spectrometry (MALDI). IHC, immunohistochemistry; ELISA, enzyme-linked immunosorbent assay; CLSM, confocal laser scanning microscopy; SPR, surface plasmon resonance.

**Supplementary Table 1: SPR kinetics of antibody binding to CAA A $\beta$  fibrils**

| <b>AD009</b>    |                                                           |                                              |                                 |
|-----------------|-----------------------------------------------------------|----------------------------------------------|---------------------------------|
| <b>Antibody</b> | <b><math>k_{on}</math> (M<sup>-1</sup>s<sup>-1</sup>)</b> | <b><math>k_{off}</math> (s<sup>-1</sup>)</b> | <b><math>K_{D1}</math> (nM)</b> |
| Aducanumab      | $3.36 \pm 1.20 \times 10^5$                               | $1.14 \pm 0.28 \times 10^{-1}$               | $358 \pm 71.7$                  |
| Bapineuzumab    | $6.72 \pm 7.86 \times 10^5$                               | $1.31 \pm 0.83 \times 10^{-3}$               | $5.96 \pm 4.96$                 |
| Crenezumab      | ND                                                        | ND                                           | ND                              |
| Donanemab       | $1.25 \pm 0.37 \times 10^4$                               | $3.08 \pm 0.39 \times 10^{-2}$               | $728 \pm 119$                   |
| Gantenerumab    | $6.46 \pm 1.41 \times 10^4$                               | $3.01 \pm 0.71 \times 10^{-2}$               | $471 \pm 57.0$                  |
| Lecanemab       | $5.36 \pm 2.73 \times 10^4$                               | $3.91 \pm 1.30 \times 10^{-2}$               | $764 \pm 134$                   |
| Solanezumab     | ND                                                        | ND                                           | ND                              |

| <b>AD062</b>    |                                                           |                                              |                                 |
|-----------------|-----------------------------------------------------------|----------------------------------------------|---------------------------------|
| <b>Antibody</b> | <b><math>k_{on}</math> (M<sup>-1</sup>s<sup>-1</sup>)</b> | <b><math>k_{off}</math> (s<sup>-1</sup>)</b> | <b><math>K_{D1}</math> (nM)</b> |
| Aducanumab      | $8.53 \pm 3.47 \times 10^4$                               | $1.03 \pm 0.41 \times 10^{-1}$               | $1220 \pm 282$                  |
| Bapineuzumab    | ND                                                        | ND                                           | ND                              |
| Crenezumab      | ND                                                        | ND                                           | ND                              |
| Donanemab       | ND                                                        | ND                                           | ND                              |
| Gantenerumab    | $3.29 \pm 0.40 \times 10^4$                               | $4.59 \pm 0.48 \times 10^{-2}$               | $1400 \pm 92.6$                 |
| Lecanemab       | ND                                                        | ND                                           | ND                              |
| Solanezumab     | ND                                                        | ND                                           | ND                              |

| <b>AD090</b>    |                                                           |                                              |                                 |
|-----------------|-----------------------------------------------------------|----------------------------------------------|---------------------------------|
| <b>Antibody</b> | <b><math>k_{on}</math> (M<sup>-1</sup>s<sup>-1</sup>)</b> | <b><math>k_{off}</math> (s<sup>-1</sup>)</b> | <b><math>K_{D1}</math> (nM)</b> |
| Aducanumab      | $1.33 \pm 1.00 \times 10^6$                               | $5.48 \pm 3.01 \times 10^{-2}$               | $54.9 \pm 31.3$                 |
| Bapineuzumab    | $9.93 \pm 10.1 \times 10^5$                               | $9.10 \pm 4.73 \times 10^{-5}$               | $0.17 \pm 0.13$                 |
| Crenezumab      | ND                                                        | ND                                           | ND                              |
| Donanemab       | $2.28 \pm 1.23 \times 10^4$                               | $8.29 \pm 2.84 \times 10^{-3}$               | $465 \pm 367$                   |
| Gantenerumab    | $7.71 \pm 4.23 \times 10^4$                               | $2.29 \pm 0.89 \times 10^{-2}$               | $347 \pm 132$                   |
| Lecanemab       | $7.96 \pm 1.44 \times 10^4$                               | $8.35 \pm 1.14 \times 10^{-2}$               | $1060 \pm 160$                  |
| Solanezumab     | ND                                                        | ND                                           | ND                              |

| <b>AD021</b>    |                                                           |                                              |                                 |
|-----------------|-----------------------------------------------------------|----------------------------------------------|---------------------------------|
| <b>Antibody</b> | <b><math>k_{on}</math> (M<sup>-1</sup>s<sup>-1</sup>)</b> | <b><math>k_{off}</math> (s<sup>-1</sup>)</b> | <b><math>K_{D1}</math> (nM)</b> |
| Aducanumab      | $2.52 \pm 0.18 \times 10^5$                               | $1.38 \pm 0.08 \times 10^{-1}$               | $548 \pm 36.7$                  |
| Bapineuzumab    | $3.33 \pm 0.21 \times 10^5$                               | $9.83 \pm 4.70 \times 10^{-5}$               | $0.30 \pm 0.16$                 |
| Crenezumab      | $8.30 \pm 2.62 \times 10^3$                               | $1.53 \pm 1.02 \times 10^{-2}$               | $2020 \pm 1540$                 |
| Donanemab       | $2.53 \pm 1.43 \times 10^4$                               | $3.02 \pm 1.18 \times 10^{-2}$               | $1260 \pm 192$                  |
| Gantenerumab    | $7.49 \pm 0.58 \times 10^4$                               | $2.92 \pm 0.34 \times 10^{-2}$               | $390 \pm 22.0$                  |
| Lecanemab       | $1.28 \pm 0.11 \times 10^5$                               | $2.18 \pm 0.12 \times 10^{-2}$               | $170 \pm 9.85$                  |
| Solanezumab     | ND                                                        | ND                                           | ND                              |

Data shown as mean  $\pm$  SD. ND: not detected.

$k_{on}$ : association rate constant;  $k_{off}$ : dissociation rate constant;  $K_{D1}$ : dissociation constant.
